# Supplementary material for: Pigmented Paravenous Retinochoroidal Atrophy (PPRCA): a systematic review
Source: Research Square preprint supplement (doi:10.21203/rs.3.rs-3334235/v1), 2023-10-06
Supplement: Supplementary file 1 [file 012251b6d37d3ed47c0479e3.xlsx]

## Sheet: Sheet1
Table 6. Follow-up pathways
First Author	Country	Gender	Age	Ethnicity	Family history or genetic factors	Duration of symptoms	Duration of Follow-up	Outcome of Follow-Up
Aoki S	Japan	Female	24	Not reported	Not reported	10 years	3 years	Stable
Barteselli G	Turkey	Female	54	Not reported	Not reported	1.5 years	1 year	Stable
Batiolglu F	Turkey	Male	28	Not reported	Not reported	2 years	6 months	Deterioration
Ferrucci S	USA	Male	40	Not reported	Not reported	37 years	3 years	Deterioration
Figueirdo R	Portugal	Male	65	Not reported	No	1 month	3 years	Improvement
Jung I	Korea	Female		Not reported	No	1 week	1 year	Stable
Kükner AS	Turkey	Male	62	Not reported	No	Not reported	Not reported	Stable
		Male	29	Not reported	No	Not reported	Not reported	Stable
		Male	64	Not reported	No	Not reported	Not reported	Stable
		Female	48	Not reported	No	Not reported	Not reported	Stable
		Male	43	Not reported	No	Not reported	Not reported	Stable
		Female	27	Not reported	No	Not reported	Not reported	Stable
		Female	58	Not reported	No	Not reported	Not reported	Stable
Lee EK	Korea	11 males	51.46 +/- 14.58 years (29-82)	Korean	2 reporting Mother will poor night vision	Not reported	0-17.5 years	1 attended; Stable
								24 Did not attend
		14 females
Limaye SR	USA	Female	51	West-Indian	No	0 years	3 years	Deterioration
Lotery AJ	Northern Ireland	Male	67	Not reported	Not reported	2 years	Not reported	Did not attend
Mukkamala L	USA	Male	15	Not reported	Not reported	0 years	6 months	Stable
Noble KG	USA	Male	41	Not reported	Not reported	Not reported	15 years	Stable
Oh JK	Colombia	Male	53	Not reported	Yes - brother has similar symptoms	8 years	10 years	Deterioration
Romero R	Spain	Female	65	Not reported	Not reported	~60 years	3 years	Stable
Rothberg DS	USA	Female	27	Black	Not reported	Not reported	2 years	Deterioration
Sekimoto M	Japan	Female	42	Not reported	No	4 years	Not reported	Deterioration
Shona OA	UK	Male	15	White	No	5 years	Not reported	Stable
		Female	44	Turkish	No	0.5 years	Not reported	Did not attend
		Male	32	White	No	1 year	Not reported	Did not attend
		Male	17	White	No	1 year	Not reported	Did not attend
		Male	45	Irish	No	30 years	Not reported	Did not attend
		Female	39	Asian	No	10 years	Not reported	Did not attend
		Female	31	White	No	0 years	Not reported	Did not attend
		Male	33.5	Asian	No	6.5 years	Not reported	Did not attend
		Female	46	White	No	9 years	Not reported	Did not attend
		Female	28	Colombian	No	4 years	Not reported	Did not attend
		Male	76	White	No	6.5 years	Not reported	Did not attend
		Male	35	Chinese	No	2.5 years	Not reported	Did not attend
		Male	68	White	Yes - mother will tunnel vision	1 year	Not reported	Did not attend
		Female	76	White	No	15.5 years	Not reported	Did not attend
		Female	23	Nigerian	No	1.42 years	Not reported	Did not attend
		Male	22	White	No	2.5 years	Not reported	Did not attend
		Female	34	Asian	No	3 years	Not reported	Stable
		Male	15	White	No	2.3 years	Not reported	Did not attend
		Female	71	Asian	No	1 year	Not reported	Did not attend
		Male	59	White	No	0 years	Not reported	Did not attend
		Male	52	White	No	10 years	Not reported	Did not attend
		Female	58	White	No	10 years	Not reported	Did not attend
		Male	45	White	No	0.75 years	Not reported	Did not attend
Smirnov VM	France	Male	4	Not reported	No	0 years	5 years	Improvement
Young WO	USA	Female	11	Black	No	Not reported	2 years	Stable
