# Supplementary material for: Pigmented Paravenous Retinochoroidal Atrophy (PPRCA): a systematic review
Source: Research Square preprint supplement (doi:10.21203/rs.3.rs-3334235/v1), 2023-10-06
Supplement: Supplementary file 2 [file 03af3dfefa2f49898ce70e8b.xlsx]

## Sheet: Sheet1
Table 2. Table of Study Characteristics
*Lee [58] did not report details of single patient cases but collated all results as averages hence these have been reported separately.
ID	First Author	Publication Year	Country	Study Type	Sample Size	Gender	Age	Ethnicity	Family history or genetic factors	Duration of symptoms
1	Ahmad M	2016	USA	Case Study	1	Female	79	Asian	No	35 years
2	Ahmed AS	2015	India	Case Study	1	Female	21	Asian	No	12 years
3	Aoki S	2017	Japan	Case Study	1	Female	24	Not reported	Not reported	10 years
4	Barteselli G	2014	USA	Case Study	1	Female	25	Japanese	No	0 years
5	Batiolglu F	2002	Turkey	Case Study	1	Female	54	Not reported	Not reported	1.5 years
6	Bozkurt N	1998	Turkey	Case Series	4	Female	54	Not reported	Not reported	Not reported
						Male	28	Not reported	Not reported	2 years
						Female	23	Not reported	Not reported	Not reported
						Female	12	Not reported	Not reported	Not reported
7	Brooks DN	1980	USA	Review + Case Series	2	Female	22	Black	No	8 months
						Male	70	Black	Not reported	3 months
8	Chen MS	1992	Taiwan	Case Study	1	Female	23	Not reported	No	8 years
9	Choi JY	2006	USA	Case Series	12	Female	8	Not reported	Not reported	Not reported
						Male	9	Not reported	Not reported	Not reported
						Male	14	Not reported	Not reported	Not reported
						Female	23	Not reported	Not reported	Not reported
						male	26	Not reported	Not reported	Not reported
						Female	32	Not reported	Not reported	Not reported
						Male	43	Not reported	Not reported	Not reported
						male	43	Not reported	Not reported	Not reported
						Male	50	Not reported	Not reported	Not reported
						male	53	Not reported	Not reported	Not reported
						Female	62	Not reported	Not reported	Not reported
						Female	67	Not reported	Not reported	Not reported
10	Choi WJ	2020	Korea	Case Study	1	Female	58	Not reported	Not reported	3 years
11	Cinicelli MV	2018	Italy	Case Study	1	Male	8	Not reported	Not reported	Not reported
12	de Carvalho MPA	2021	Brazil	Case Study	1	Male	53	Not reported	No	Not reported
13	Deshmuhk S	2019	India	Review + Case Study	1	Female	24
14	Eagle RC Jr	1982	USA	Case Study	1	Female	75	Not reported	Not reported	5 years
15	Fernandez-Sanz F	2017	UK	Case Study	1	Female	31	Arab	No	6 years
16	Ferrucci S	1998	USA	Case Study	1	Male	40	Not reported	Not reported	37 years
17	Figueirdo R	2019	Portugal	Case Study	1	Male	65	Not reported	No	1 month
18	Fischer N	2022	UK	Case Study	1	Male	48	Not reported	No	2 years
19	Fleckenstein M	2009	Germany	Case Series	3	Male	21	Caucasian	Yes - mother has bilateral RP	Not reported
						Female	16	Not reported	No	Not reported
						Female	74	Not reported	No	Not reported
20	Gasparian S	2021	USA	Case Study	1	Female	48	Asian
21	Ghosh B	2012	India	Case Study	1	Female	35	Not reported	No	4 months
22	Hayasaka S	1991	Japan	Case Study	1	Male	68	Not reported	No	10 years
23	Hernandez-Da M	2011	Mexico	Case Study	1	Female	50	Not reported	Not reported	Not reported
24	Johansen J	1988	Denmark	Case Series	2	Female	43	Not reported	Not reported	19 years
						Male	73	Not reported	Not reported	Not reported
25	Jung I	2021	Korea	Case Study	1	Female	61	Not reported	No	1 week
26	Junqueira DL	2013	Brazil	Case Study	1	Male	41	White	No	Not reported
27	Klop K	1984	The Netherlands	Case Series	2	Male	21	Not reported	No	0 years
						Female	23	Not reported	No	0 years
28	Kükner AS	2003	Turkey	Review + Case Series	7	Male	62	Not reported	No	Not reported
						Male	29	Not reported	No	Not reported
						Male	64	Not reported	No	Not reported
						Female	48	Not reported	No	Not reported
						Male	43	Not reported	No	Not reported
						Female	27	Not reported	No	Not reported
						Female	58	Not reported	No	Not reported
29	Kumar V	2019	India	Case Series	5	Male	67	Not reported	Not reported	Not reported
						Female	38	Not reported	Not reported	Not reported
						Male	50	Not reported	Not reported	Not reported
						Male	40	Not reported	Not reported	Not reported
						Male	22	Not reported	Not reported	Not reported
30	Lee EK*	2021	Korea	Case Series	25	11 males	51.46 +/- 14.58 years (29-82)	Korean	2 reporting Mother will poor night vision	Not reported
						14 females
31	Lenci LT	2016	USA	Case Study	1	Female	50	Not reported	No	Not reported
32	Limaye SR	1987	USA	Case Study	1	Female	51	West-Indian	No	0 years
33	Lotery AJ	1996	Northern Ireland	Case Study	1	Male	67	Not reported	Not reported	2 years
34	Martins Melo I	2022	Brazil	Case Study	1	Female	47	Not reported	No	1 year
35	Mehrotra N	2019	India	Case Study	1	Female	22	Not reported	Not reported	8 years
36	Mukkamala L	2020	USA	Case Study	1	Male	15	Not reported	Not reported	0 years
37	Noble KG	1989	USA	Case Study	2	Male	37	Not reported	No	27 years
						Male	41	Not reported	Not reported	Not reported
38	Nucci P	1994	Italy	Case Study	1	Male	21	Caucasian	No	Not reported
39	Obata R	2006	Japan	Case Series	2	Female	33	Not reported	Yes - brother has similar symptoms	Not reported
						Male	31	Not reported	Yes - sister has similar symptoms	~25 years
40	Oh JK	2022	Colombia	Case Series	2	Male	53	Not reported	Yes - brother has similar symptoms	8 years
						Male	48	Not reported	Yes - brother has similar symptoms	1 year
41	Parafita M	1993	Spain	Case Study	1	Female	69	Not reported	No	0 years
42	Peduzzi M	1984	Italy	Case Study	1	Female	26	Not reported	Not reported	2 years
43	Rahmatohul P	2020	France	Case Study	1	Female	28	Not reported	No	2 years
44	Ranjan R	2022	India	Case Study	1	Female	23	Not reported	No	0 years
45	Ratra D	2016	India	Case Study	1	Female	32	Indian	No	Not reported
46	Romero R	2013	Spain	Case Study	1	Female	65	Not reported	Not reported	~60 years
47	Rothberg DS	1984	USA	Case Series	3	Female	33	Not reported	No	4 years
						Female	27	Black	Not reported	Not reported
						Male	32	White	Not reported	Not reported
48	Schweitzer NM	1982	The Netherlands	Case Study	1	Female	7	Not reported	Not reported	6 years
49	Sekimoto M	1993	Japan	Case Series	2	Female	42	Not reported	No	4 years
						Male	62	Not reported	No	2 years
50	Shah SM	2020	UK	Case Study	1	Female	41	Caucasian	5 years	Yes - retinitis pigmentosa is maternal relative; retinal spots in sister and maternal cousin
51	Shen Y	2018	China	Case Study	1	Female	66	Chinese	No	2 years
52	Shona OA	2019	UK	Case Series	23	Male	15	White	No	5 years
						Female	44	Turkish	No	0.5 years
						Male	32	White	No	1 year
						Male	17	White	No	1 year
						Male	45	Irish	No	30 years
						Female	39	Asian	No	10 years
						Female	31	White	No	0 years
						Male	33.5	Asian	No	6.5 years
						Female	46	White	No	9 years
						Female	28	Colombian	No	4 years
						Male	76	White	No	6.5 years
						Male	35	Chinese	No	2.5 years
						Male	68	White	Yes - mother will tunnel vision	1 year
						Female	76	White	No	15.5 years
						Female	23	Nigerian	No	1.42 years
						Male	22	White	No	2.5 years
						Female	34	Asian	No	3 years
						Male	15	White	No	2.3 years
						Female	71	Asian	No	1 year
						Male	59	White	No	0 years
						Male	52	White	No	10 years
						Female	58	White	No	10 years
						Male	45	White	No	0.75 years
53	Small KW	1991	USA	Case Study	1	Female	43	Not reported	No	30 years
54	Smirnov VM	2019	France	Case Study	1	Male	4	Not reported	No	0 years
55	Sun Y	2022	China	Case Study	1	Female	55	Chinese	No	20 years
56	Tandon M	2013	India	Case Study	1	Male	64	Asian	No	5 years
57	Traboulsi EI	1986	USA	Case Series	4	Female	35	Not reported	Not reported	Not reported
						Male	10	Not reported	Not reported	Not reported
						Male	7	Not reported	Not reported	Not reported
						Male	4	Not reported	Not reported	Not reported
58	Traversi C	2000	Italy	Case Series	3	Female	28	Not reported	No	Not reported
						Female	10	Not reported	Not reported	3 years
						Male	6	Not reported	Not reported	0 years
59	Yamaguchi K	1989	Japan	Case Study	1	Male	47	Japanese	No	6 months
60	Yanagi Y	2003	Japan	Case Series	4	Female	10	Not reported	No	0 years
						Female	10	Not reported	No	0 years
						Female	43	Not reported	No	0 years
						Male	54	Not reported	No	0 years
61	Young WO	1993	USA	Case Study	1	Female	11	Black	No	Not reported
