# Supplementary material for: Pigmented Paravenous Retinochoroidal Atrophy (PPRCA): a systematic review
Source: Research Square preprint supplement (doi:10.21203/rs.3.rs-3334235/v1), 2023-10-06
Supplement: Supplementary file 3 [file 05f0e6f0deaf38af5868c555.xlsx]

## Sheet: Sheet1
Table 5. Treatment pathways for 6 patients
Note. Outlines the 6 case studies where patients were offered treatment following their PPRCA diagnosis. Similarities across cases have been highlighted in green.
First Author	Country	Ethnicity	Gender	Age	Genetic or Familial Factors	Duration of Symptoms	Treatment offered
Figueiredo R	Portugal	Not reported	Male	65	No	1 month	“topical 2.0% dorzolamide and a loading dose of three intravitreal bevacizumab injections” for the left eye followed by “pro re nata treatment regimen for 12 months”
Smirnov VM	France	Not reported	Male	4	No	0 years	presented with intraretinal cysts and was “treated with immunosupressive drugs”.
Bozkurt N	Turkey	Not reported	Male	28	No	2 years	“was treated for glaucoma”
Lotery AJ	Nothern Ireland	Not reported	Male	67	No	2 years	“was treated with intravenous penicillin for 14 days”
Batioglu F	Turkey	Not reported	Female	54	No	1.5 years	“was treated with corticosteroids and acetazolamide
Sekimoto M	Japan	Not reported	Female	42	No	37 years	“underwent a topical instillation of artificial tears”
