# Supplementary material for: Pigmented Paravenous Retinochoroidal Atrophy (PPRCA): a systematic review
Source: Research Square preprint supplement (doi:10.21203/rs.3.rs-3334235/v1), 2023-10-06
Supplement: Supplementary file 4 [file 5741872ef53a1acacfecbc10.xlsx]

## Sheet: Sheet1
Table 4. Thematic Codebook
Theme	Subtheme	Code
Symptoms	Retinochorodial Atrophy	Retinal degeneration, accumulation of pigment; pigment clumps; atrophy; bony spicules; atrophic changes
	Changes in Fluorescence	Hyper-fluorescence; Hypo-fluorescence; demarcation lines; window defect; blocked
	Degeneration of Retinal Pigment Epithelium	Degeneration; atrophy
	Disruptions to Retinal Functioning	Electroretinograms; PERG; mfERG; ffERG; photoreceptors; cones; rods
Clinical Pathways	Duration of symptoms	Duration
	Genetic and Family History	Family history; parents; siblings; relatives
	Treatment	Medications; interventions;
	Follow-Up	Assessment; Referrals; Outcomes; Change; Deterioration; Improvements; No change; no follow-up
Symptom Measurement tools	Ultra-Wide Field Fundus Photography	Ultra-Wide Field Fundus Photography; UWFPP
	Fluorescein Angiography	Fluorescein Angiography, FA
	Indocyanine Green Angiography	Indocyanine Green Angiography; IGA
	Optical Coherence Tomography	Optical Coherence Tomography; OCT
	Spectral Domain Optical Coherence Tomography	Spectral Domain Optical Coherence Tomography; SD-OCT; SDOCT; Spectral domain OCT
