# Supplementary material for: Pigmented Paravenous Retinochoroidal Atrophy (PPRCA): a systematic review
Source: Research Square preprint supplement (doi:10.21203/rs.3.rs-3334235/v1), 2023-10-06
Supplement: Supplementary file 5 [file b396176a93f5a7a93a20a3dd.xlsx]

## Sheet: Sheet1
Table 7. Symptom measurement tools
Table 7 outlines the various symptom assessment tools used in each of the studies within this systematic review.
Note. A colour-code system was used. Green means that particular symptom measurement tool was used. Red means the use of that symptom measurement tool was not recorded.
First Author	Country	Study Type	Sample Size	Symptom Measurement Tools
				Ultra-Wide Field Fundus Photography	Fluorescein Angiography	Indocyanine Green Angiography	Optical Coherence Tomography and Spectral Domain Optical Coherence Tomography	Electroretinograms
Ahmad M	USA	Case Study	1
Ahmed AS	India	Case Study	1
Aoki S	Japan	Case Study	1
Barteselli G	USA	Case Study	1
Batiolglu F	Turkey	Case Study	1
Bozkurt N	Turkey	Case Series	4
Brooks DN	USA	Review + Case Series	2
Chen MS	Taiwan	Case Study	1
Choi JY	USA	Case Series	12
Choi WJ	Korea	Case Study	1
Cinicelli MV	Italy	Case Study	1
de Carvalho MPA	Brazil	Case Study	1
Deshmuhk S	India	Review + Case Study	1
Eagle RC Jr	USA	Case Study	1
Fernandez-Sanz F	UK	Case Study	1
Ferrucci S	USA	Case Study	1
Figueirdo R	Portugal	Case Study	1
Fischer N	UK	Case Study	1
Fleckenstein M	Germany	Case Series	3
Gasparian S	USA	Case Study	1
Ghosh B	India	Case Study	1
Hayasaka S	Japan	Case Study	1
Hernandez-Da M	Mexico	Case Study	1
Johansen J	Denmark	Case Series	2
Jung I	Korea	Case Study	1
Junqueira DL	Brazil	Case Study	1
Klop K	The Netherlands	Case Series	2
Kükner AS	Turkey	Review + Case Series	7
Kumar V	India	Case Series	5
Lee EK*	Korea	Case Series	25
Lenci LT	USA	Case Study	1
Limaye SR	USA	Case Study	1
Lotery AJ	Northern Ireland	Case Study	1
Martins Melo I	Brazil	Case Study	1
Mehrotra N	India	Case Study	1
Mukkamala L	USA	Case Study	1
Noble KG	USA	Case Study	2
Nucci P	Italy	Case Study	1
Obata R	Japan	Case Series	2
Oh JK	Colombia	Case Series	2
Parafita M	Spain	Case Study	1
Peduzzi M	Italy	Case Study	1
Rahmatohul P	France	Case Study	1
Ranjan R	India	Case Study	1
Ratra D	India	Case Study	1
Romero R	Spain	Case Study	1
Rothberg DS	USA	Case Series	3
Schweitzer NM	The Netherlands	Case Study	1
Sekimoto M	Japan	Case Series	2
Shah SM	UK	Case Study	1
Shen Y	China	Case Study	1
Shona OA	UK	Case Series	23
Small KW	USA	Case Study	1
Smirnov VM	France	Case Study	1
Sun Y	China	Case Study	1
Tandon M	India	Case Study	1
Traboulsi EI	USA	Case Series	4
Traversi C	Italy	Case Series	3
Yamaguchi K	Japan	Case Study	1
Yanagi Y	Japan	Case Series	4
Young WO	USA	Case Study	1
