# Supplementary material for: Pigmented Paravenous Retinochoroidal Atrophy (PPRCA): a systematic review
Source: Research Square preprint supplement (doi:10.21203/rs.3.rs-3334235/v1), 2023-10-06
Supplement: Supplementary file 6 [file d26d837cc607000f03de8c60.xlsx]

## Sheet: Sheet1
Table 3. Best Corrected Visual Acuity scores.
Snellen fraction	logMAR	Eyes, n (%)	Left	Right
20/600	1.48	2 (0.75%)	1	1
20/400	1.3	5 (1.87%)	2	3
20/399	1.3	1 (0.37%)	1	0
20/200	1	4 (1.49%)	3	1
20/160	0	3 (1.12%)	2	1
20/100	0.7	5 (1.87%)	4	1
20/80	0.6	3 (1.12%)	2	1
20/70	0.55	1 (0.37%)	1	0
20/66	0.52	3 (1.12%)	2	1
20/63	0.5	1 (0.37%)	1	0
20/62.5	0.5	1 (0.37%)	1	0
20/60	0.48	5 (1.87%)	1	4
20/59	0.47	4 (1.49%)	2	2
20/50	0.4	3 (1.12%)	1	2
20/50*	0.43 +/-0.81	25 (9.33%)	25	25
20/40*	0.34 +/- 0.83
20/40	0.3	15 (5.6%)	6	9
20/33	0.22	6 (2.24%)	3	3
20/32	0.2	4 (1.49%)	3	1
20/30	0.18	21 (7.84%)	14	7
20/29	0.15	2 (0.75%)	2	0
20/25	0.1	26 (9.7%)	11	15
20/24	0.08	2 (0.75%)	1	1
20/22	0.05	2 (0.75%)	1	1
20/20	0	78 (29.1%)	36	42
20/20P	0	2 (0.75%)	1	1
20/18	-0.05	1 (0.37%)	1	0
20/17	-0.08	19 (7.09%)	11	8
20/15	-0.12	6 (2.24%)	3	3
Hand Motion	-	6 (2.24%)	2	4
Counting Fingers	-	7 (2.6%)	1	6
Perception of Light	-	2 (0.75%)	1	1
No light perception	-	3 (1.12%)	1	2
