# Supplementary material for: Pigmented Paravenous Retinochoroidal Atrophy (PPRCA): a systematic review
Source: Research Square preprint supplement (doi:10.21203/rs.3.rs-3334235/v1), 2023-10-06
Supplement: Supplementary file 7 [file e50f2bfb1f8b4a3819868054.xlsx]

## Sheet: Sheet1
Table 1. Risk of Bias Table using CASP
First Author	Publication Year	Section A: Are the results valid?						Section B: What are the results?			Section C: Will the results help locally?	Overall
		Was there a clear statement of the aims of the research?	Is a qualitative methodology appropriate?	Was the research design appropriate to address the aims of the research?	Was the recruitment strategy appropriate to the aims of the research?	Was the data collected in a way that addresses the research issue?	Has the relationship between researcher and participants been considered adequately?	Have ethical issues been taken into consideration?	Was the data analysis sufficiently rigorous?	Is there a clear statement of findings?	How valuable is the research?
Ahmad M	2016	🗸	🗸	🗸	🗸	🗸	🗸	🗸	?	🗸	🗸
Ahmed AS	2015	🗸	🗸	🗸	🗸	🗸	🗸	?	?	🗸	🗸
Aoki S	2017	🗸	🗸	🗸	🗸	🗸	🗸	X	?	🗸	🗸
Barteselli G	2014	🗸	🗸	🗸	🗸	🗸	🗸	?	?	🗸	🗸
Batiolglu F	2002	🗸	🗸	🗸	🗸	🗸	🗸	?	?	🗸	🗸
Bozkurt N	1998	🗸	🗸	🗸	🗸	🗸	🗸	?	?	🗸	🗸
Brooks DN	1980	🗸	🗸	🗸	🗸	🗸	🗸	?	?	🗸	🗸
Chen MS	1992	🗸	🗸	🗸	🗸	🗸	🗸	?	?	🗸	🗸
Choi JY	2006	🗸	🗸	🗸	🗸	🗸	🗸	?	?	🗸	🗸
Choi WJ	2020	🗸	🗸	🗸	🗸	🗸	🗸	?	?	🗸	🗸
Cinicelli MV	2018	🗸	🗸	🗸	?	🗸	🗸	🗸	?	🗸	🗸
de Carvalho MPA	2021	🗸	🗸	🗸	🗸	🗸	🗸	?	?	🗸	🗸
Deshmuhk S	2019	🗸	🗸	🗸	🗸	🗸	🗸	🗸	?	🗸	🗸
Eagle RC Jr	1982	🗸	🗸	🗸	🗸	🗸	🗸	?	?	🗸	🗸
Fernandez-Sanz F	2017	🗸	🗸	🗸	🗸	🗸	🗸	?	?	🗸	🗸
Ferrucci S	1998	🗸	🗸	🗸	🗸	🗸	🗸	?	?	🗸	🗸
Figueirdo R	2019	🗸	🗸	🗸	🗸	🗸	🗸	🗸	?	🗸	🗸
Fischer N	2022	🗸	🗸	🗸	🗸	🗸	🗸	?	?	🗸	🗸
Fleckenstein M	2009	🗸	🗸	🗸	🗸	🗸	🗸	🗸	?	🗸	🗸
Gasparian S	2021	🗸	🗸	🗸	🗸	🗸	🗸	🗸	?	🗸	🗸
Ghosh B	2012	🗸	🗸	🗸	🗸	🗸	🗸	?	?	🗸	🗸
Hayasaka S	1991	🗸	🗸	🗸	🗸	🗸	🗸	?	?	🗸	🗸
Hernandez-Da M	2011	🗸	🗸	🗸	🗸	🗸	🗸	🗸	?	🗸	🗸
Johansen J	1988	🗸	🗸	🗸	🗸	🗸	🗸	?	?	🗸	🗸
Jung I	2021	🗸	🗸	🗸	🗸	🗸	🗸	🗸	?	🗸	🗸
Junqueira DL	2013	🗸	🗸	🗸	🗸	🗸	🗸	?	?	🗸	🗸
Klop K	1984	🗸	🗸	🗸	🗸	🗸	🗸	?	?	🗸	🗸
Kükner AS	2003	🗸	🗸	🗸	🗸	🗸	🗸	?	?	🗸	🗸
Kumar V	2019	🗸	🗸	🗸	🗸	?	🗸	?	🗸	🗸	🗸
Lee EK	2021	🗸	🗸	🗸	🗸	🗸	🗸	?	?	🗸	🗸
Lenci LT	2016	🗸	🗸	🗸	🗸	🗸	🗸	?	?	🗸	🗸
Limaye SR	1987	🗸	🗸	🗸	🗸	🗸	🗸	?	?	🗸	🗸
Lotery AJ	1996	🗸	🗸	🗸	🗸	🗸	🗸	?	?	🗸	🗸
Martins Melo I	2022	🗸	🗸	🗸	🗸	🗸	🗸	?	?	🗸	🗸
Mehrotra N	2019	🗸	🗸	🗸	🗸	🗸	🗸	🗸	?	🗸	🗸
Mukkamala L	2020	🗸	🗸	🗸	🗸	🗸	🗸	🗸	?	🗸	🗸
Murray AT	2000	🗸	🗸	🗸	🗸	🗸	🗸	?	?	🗸	🗸
Noble KG	1989	🗸	🗸	🗸	🗸	🗸	🗸	?	?	🗸	🗸
Nucci P	1994	🗸	🗸	🗸	🗸	🗸	🗸	?	?	🗸	🗸
Obata R	2006	🗸	🗸	🗸	🗸	🗸	🗸	?	?	🗸	🗸
Oh JK	2022	🗸	🗸	🗸	🗸	🗸	🗸	🗸	?	🗸	🗸
Parafita M	1993	🗸	🗸	🗸	🗸	🗸	🗸	?	?	🗸	🗸
Peduzzi M	1984	🗸	🗸	🗸	🗸	🗸	🗸	?	?	🗸	🗸
Rahmatohul P	2020	🗸	🗸	🗸	🗸	🗸	🗸	🗸	?	🗸	🗸
Ranjan R	2022	🗸	🗸	🗸	🗸	🗸	🗸	🗸	?	🗸	🗸
Ratra D	2016	🗸	🗸	🗸	🗸	🗸	🗸	?	?	🗸	🗸
Romero R	2013	🗸	🗸	🗸	🗸	🗸	🗸	?	?	🗸	🗸
Rothberg DS	1984	🗸	🗸	🗸	🗸	🗸	🗸	?	?	🗸	🗸
Schweitzer NM	1982	🗸	🗸	🗸	🗸	🗸	🗸	?	?	🗸	🗸
Sekimoto M	1993	🗸	🗸	🗸	🗸	🗸	🗸	?	?	🗸	🗸
Shah SM	2020	🗸	🗸	🗸	🗸	🗸	🗸	?	?	🗸	🗸
Shen Y	2018	🗸	🗸	🗸	🗸	🗸	🗸	🗸	?	🗸	🗸
Shona OA	2019	🗸	🗸	🗸	🗸	🗸	🗸	🗸	?	🗸	🗸
Small KW	1991	🗸	🗸	🗸	🗸	🗸	🗸	🗸	?	🗸	🗸
Smirnov VM	2019	🗸	🗸	🗸	🗸	🗸	🗸	🗸	?	🗸	🗸
Sun Y	2022	🗸	🗸	🗸	🗸	🗸	🗸	🗸	?	🗸	🗸
Tandon M	2013	🗸	🗸	🗸	🗸	🗸	🗸	?	?	🗸	🗸
Traboulsi EI	1986	🗸	🗸	🗸	🗸	🗸	🗸	?	?	🗸	🗸
Traversi C	2000	🗸	🗸	🗸	🗸	🗸	🗸	?	?	🗸	🗸
Yamaguchi K	1989	🗸	🗸	🗸	🗸	🗸	🗸	🗸	?	🗸	🗸
Yanagi Y	2003	🗸	🗸	🗸	🗸	🗸	🗸	?	?	🗸	🗸
Young WO	1993	🗸	🗸	🗸	🗸	🗸	🗸	X	?	🗸	🗸
